# Supplementary material for: Functional diversity among sensory neurons from efficient coding principles
Source: PubMed Central journal article supplement (PMC6890262; doi:10.1371/journal.pcbi.1007476), 2019-11-14
Supplement: pcbi.1007476.s004.pdf [file pcbi.1007476.s004.pdf]

**Table S1.** Conditional probability matrix  $p(n_1, n_2|s)$  for a mixed ON-OFF system.

| $(n_1, n_2)$          | (0, 0) | (0, 1)    | (1, 0)    | (1, 1) |
|-----------------------|--------|-----------|-----------|--------|
| stimulus regime       |        |           |           |        |
| $\theta_1$            | $q$    | 0         | $(1 - q)$ | 0      |
| $\theta_2 - \theta_1$ | 1      | 0         | 0         | 0      |
| $1 - \theta_2$        | $q$    | $(1 - q)$ | 0         | 0      |
