# Supplementary material for: Functional diversity among sensory neurons from efficient coding principles
Source: PubMed Central journal article supplement (PMC6890262; doi:10.1371/journal.pcbi.1007476), 2019-11-14
Supplement: pcbi.1007476.s005.pdf [file pcbi.1007476.s005.pdf]

**Table S2.** Conditional probability matrix  $p(n_1, n_2|s)$  for a homogeneous ON-ON system.

| stimulus regime \ $(n_1, n_2)$ | (0, 0) | (0, 1)     | (1, 0)     | (1, 1)      |
|--------------------------------|--------|------------|------------|-------------|
| $\theta_1$                     | 1      | 0          | 0          | 0           |
| $\theta_2 - \theta_1$          | $q$    | 0          | $(1 - q)$  | 0           |
| $1 - \theta_2$                 | $q^2$  | $q(1 - q)$ | $q(1 - q)$ | $(1 - q)^2$ |
