# Supplementary material for: Functional diversity among sensory neurons from efficient coding principles
Source: PubMed Central journal article supplement (PMC6890262; doi:10.1371/journal.pcbi.1007476), 2019-11-14
Supplement: pcbi.1007476.s006.pdf [file pcbi.1007476.s006.pdf]

**Table S3.** Mutual information for the systems comprised of binary cells, one ON and one OFF cells, vs. two ON cells (see S1 Figure) where the spike counts  $r$  and  $R$  have been varied, assuming Poisson noise on the spike count. In all cases, the information is nearly identical.

| Information (ON-OFF vs. 2ON) in bits | $R = 1$           | $R = 10$        |
|--------------------------------------|-------------------|-----------------|
| $r = 0.2R$                           | 0.244 vs. 0.242   | 0.959 vs. 0.958 |
| $r = 0.5R$                           | 0.0795 vs. 0.0792 | 0.529 vs. 0.527 |
